# Supplementary material
Source: ML conference proceedings conference paper supplement (https://proceedings.mlr.press/v139/lazic21a.html)
Supplement: Supplementary file [file lazic21a-supp.pdf]

## Appendix

### A. Preliminaries

We state some useful definitions and lemmas in this section.

**Lemma A.1.** Let  $X_1$  and  $X_2$  be a pair of distribution vectors. Let  $H$  be the transition matrix of an ergodic Markov chain with a stationary distribution  $\nu$ , and ergodicity coefficient (defined in Assumption 2.1) upper-bounded by  $\gamma < 1$ . Then

$$\|(H^m)^\top (X_1 - X_2)\|_1 \leq \gamma^m \|X_1 - X_2\|_1.$$

*Proof.* Let  $\{v_1, \dots, v_n\}$  be the normalized left eigenvectors of  $H$  corresponding to ordered eigenvalues  $\{\lambda_1, \dots, \lambda_n\}$ . Then  $v_1 = \nu$ ,  $\lambda_1 = 1$ , and for all  $i \geq 2$ , we have that  $\lambda_i < 1$  (since the chain is ergodic) and  $v_i^\top \mathbf{1} = 0$ . Write  $X_1$  in terms of the eigenvector basis as:

$$X_1 = \alpha_1 \nu + \sum_{i=2}^n \alpha_i v_i \quad \text{and} \quad X_2 = \beta_1 \nu + \sum_{i=2}^n \beta_i v_i.$$

Since  $X_1^\top \mathbf{1} = 1$  and  $X_2^\top \mathbf{1} = 1$ , it is easy to see that  $\alpha_1 = \beta_1 = 1$ . Thus we have

$$\|H^\top (X_1 - X_2)\|_1 = \|H^\top \sum_{i=2}^n (\alpha_i - \beta_i) v_i\|_1 \leq \gamma \left\| \sum_{i=2}^n (\alpha_i - \beta_i) v_i \right\|_1 = \gamma \|X_1 - X_2\|_1$$

where the inequality follows from the definition of the ergodicity coefficient and the fact that  $\mathbf{1}^\top v_i = 0$  for all  $i \geq 2$ . Since

$$\mathbf{1}^\top H^\top \sum_{i=2}^n (\alpha_i - \beta_i) v_i = \mathbf{1}^\top \sum_{i=2}^n \lambda_i (\alpha_i - \beta_i) v_i = 0,$$

the inequality also holds for powers of  $H$ . □

**Lemma A.2** (Doob martingale). Let Assumption 2.1 hold, and let  $\{(x_t, a_t)\}_{t=1}^T$  be the state-action sequence obtained when following policies  $\pi_1, \dots, \pi_k$  for  $\tau$  steps each from an initial distribution  $\nu_0$ . For  $t \in [T]$ , let  $X_t$  be a binary indicator vector with a non-zero element at the linear index of the state-action pair  $(x_t, a_t)$ . Define for  $i \in [T]$ ,

$$B_i = \mathbb{E} \left[ \sum_{t=1}^T X_t | X_1, \dots, X_i \right], \quad \text{and} \quad B_0 = \mathbb{E} \left[ \sum_{t=1}^T X_t \right].$$

Then,  $\{B_i\}_{i=0}^T$  is a vector-valued martingale:  $\mathbb{E}[B_i - B_{i-1} | B_0, \dots, B_{i-1}] = 0$  for  $i = 1, \dots, T$ , and  $\|B_i - B_{i-1}\|_1 \leq 2(1 - \gamma)^{-1}$  holds for  $i \in [T]$ .

The constructed martingale is known as the Doob martingale underlying the sum  $\sum_{t=1}^T X_t$ .

*Proof.* That  $\{B_i\}_{i=0}^T$  is a martingale follows from the definition. We now bound its difference sequence. Let  $H_t$  be the state-action transition matrix at time  $t$ , and let  $H_{i:t} = \prod_{j=i}^{t-1} H_j$ , and define  $H_{i:i} = I$ . Then, for  $t = 0, \dots, T-1$ ,  $\mathbb{E}[X_{t+1} | X_t] = H_t^\top X_t$  and by the Markov property, for any  $i \in [T]$ ,

$$B_i = \sum_{t=1}^i X_t + \sum_{t=i+1}^T \mathbb{E}[X_t | X_i] = \sum_{t=1}^i X_t + \sum_{t=i+1}^T H_{i:t}^\top X_t, \quad \text{and} \quad B_0 = \sum_{t=1}^T H_{0:t}^\top X_0.$$

For any  $i \in [T]$ ,

$$\begin{aligned} B_i - B_{i-1} &= \sum_{t=1}^i X_t - \sum_{t=1}^{i-1} X_t + \sum_{t=i+1}^T H_{i:t}^\top X_t - \sum_{t=i}^T H_{i-1:t}^\top X_{i-1} \\ &= \sum_{t=i}^T H_{i:t}^\top (X_t - H_{i-1:t}^\top X_{i-1}). \end{aligned} \tag{A.1}$$

Since  $X_i$  and  $H_{i-1}^\top X_{i-1}$  are distribution vectors, under Assumption 2.1 and using Lemma A.1,

$$\|B_i - B_{i-1}\|_1 \leq \sum_{t=i}^T \|H_{i:t}^\top (X_i - H_{i-1}^\top X_{i-1})\|_1 \leq 2 \sum_{j=0}^{T-i} \gamma^j \leq 2(1-\gamma)^{-1}.$$

□

Let  $(\mathcal{F}_k)_k$  be a filtration and define  $\mathbb{E}_k[\cdot] := \mathbb{E}[\cdot | \mathcal{F}_k]$ . We will make use of the following concentration results for the sum of random matrices and vectors.

**Theorem A.3** (Matrix Azuma, Tropp (2012) Thm 7.1). Consider a finite  $(\mathcal{F})_k$ -adapted sequence  $\{X_k\}$  of Hermitian matrices of dimension  $m$ , and a fixed sequence  $\{A_k\}$  of Hermitian matrices that satisfy  $\mathbb{E}_{k-1} X_k = 0$  and  $X_k^2 \preceq A_k^2$  almost surely. Let  $v = \|\sum_k A_k^2\|$ . Then with probability at least  $1 - \delta$ ,  $\|\sum_k X_k\|_2 \leq 2\sqrt{2v \ln(m/\delta)}$ .

A version of Theorem A.3 for non-Hermitian matrices of dimension  $m_1 \times m_2$  can be obtained by applying the theorem to a Hermitian dilation of  $X$ ,  $\mathcal{D}(X) = \begin{bmatrix} 0 & X \\ X^* & 0 \end{bmatrix}$ , which satisfies  $\lambda_{\max}(\mathcal{D}(X)) = \|X\|$  and  $\mathcal{D}(X)^2 = \begin{bmatrix} XX^* & 0 \\ 0 & X^*X \end{bmatrix}$ . In this case, we have that  $v = \max(\|\sum_k X_k X_k^*\|, \|\sum_k X_k^* X_k\|)$ .

**Lemma A.4** (Hoeffding-type inequality for norm-subGaussian random vectors, Jin et al. (2019)). Consider random vectors  $X_1, \dots, X_n \in \mathbb{R}^d$  and corresponding filtrations  $\mathcal{F}_i = \sigma(X_1, \dots, X_i)$   $i \in [n]$ , such that  $X_i | \mathcal{F}_{i-1}$  is zero-mean norm-subGaussian with  $\sigma_i \in \mathcal{F}_{i-1}$ . That is:

$$\mathbb{E}[X_i | \mathcal{F}_i] = 0, \quad P(\|X_i\| \geq t | \mathcal{F}_{i-1}) \leq 2 \exp(-t^2/2\sigma_i^2) \quad \forall t \in \mathbb{R}, \forall i \in [n].$$

If the condition is satisfied for fixed  $\{\sigma_i\}$ , there exists a constant  $c$  such that for any  $\delta > 0$ , with probability at least  $1 - \delta$ ,

$$\left\| \sum_{i=1}^n X_i \right\| \leq c \sqrt{\sum_{i=1}^n \sigma_i^2 \log(2d/\delta)}.$$

## B. Bounding the Difference Between Empirical and Average Rewards

In this section, we bound the second term in Equation 5.1, corresponding to the difference between empirical and average rewards.

**Lemma B.1.** Let Assumption 2.1 hold, and assume that  $\tau \geq \frac{\log T}{2 \log(1/\gamma)}$  and that  $r(x, a) \in [0, 1]$  for all  $x, a$ . Then, by choosing  $\eta = \frac{\sqrt{8 \log |\mathcal{A}|}}{Q_{\max} \sqrt{K}}$ , we have with probability at least  $1 - \delta$ ,

$$\sum_{k=1}^K \sum_{t=(k-1)\tau+1}^{k\tau} (r_t - J_{\pi_k}) \leq 2(1-\gamma)^{-1} \sqrt{2T \log(2/\delta)} + 2\sqrt{T} + (1-\gamma)^{-2} \sqrt{8K \log |\mathcal{A}|}.$$

*Proof.* Let  $r$  denote the vector of rewards, and recall that  $J_\pi = \nu_\pi^\top r$ . Let  $X_t$  be the indicator vector for the state-action pair at time  $t$ , as in Lemma A.2, and let  $\nu_t = \mathbb{E}[X_t]$ . We have the following:

$$V_T := \sum_{k=1}^K \sum_{t=(k-1)\tau+1}^{k\tau} (r_t - J_{\pi_k}) = \sum_{k=1}^K \sum_{t=(k-1)\tau+1}^{k\tau} r^\top (X_t - \nu_t + \nu_t - \nu_{\pi_k})$$

We slightly abuse the notation above by letting  $\nu_t$  denote the state-action distribution at time  $t$ , and  $\nu_\pi$  the stationary distribution of policy  $\pi$ . Let  $\{B_i\}_{i=0}^T$  be the Doob martingale in Lemma A.2. Then  $B_0 = \sum_{t=1}^T \nu_t$  and  $B_T = \sum_{t=1}^T X_t$ , and the first term can be expressed as

$$V_{T1} := \sum_{t=1}^T r^\top (X_t - \nu_t) = r^\top (B_T - B_0).$$

By Lemma A.2,  $|\langle B_i - B_{i-1}, r \rangle| \leq \|B_i - B_{i-1}\|_1 \|r\|_\infty \leq 2(1 - \gamma)^{-1}$ . Hence by Azuma's inequality, with probability at least  $1 - \delta$ ,

$$V_{T_1} \leq 2(1 - \gamma)^{-1} \sqrt{2T \log(2/\delta)}. \quad (\text{B.1})$$

For the second term we have

$$\begin{aligned} V_{T_2} &:= \sum_{k=1}^K \sum_{t=(k-1)\tau+1}^{k\tau} r^\top (\nu_t - \nu_{\pi_k}) \\ &= \sum_{k=1}^K r^\top \left( \sum_{i=1}^{\tau} (H_{\pi_k}^i)^\top \nu_{(k-1)\tau} - \nu_{\pi_k} \right) \\ &\leq \sum_{k=1}^K \|r\|_\infty \sum_{i=1}^{\tau} \left\| (H_{\pi_k}^i)^\top (\nu_{(k-1)\tau} - \nu_{\pi_{k-1}} + \nu_{\pi_{k-1}}) - \nu_{\pi_k} \right\|_1 \\ &\leq \sum_{k=1}^K \sum_{i=1}^{\tau} \left\| \nu_{(k-1)\tau} - \nu_{\pi_{k-1}} \right\|_1 + \left\| (H_{\pi_k}^i)^\top \nu_{\pi_{k-1}} - \nu_{\pi_k} \right\|_1 \\ &\leq \sum_{k=1}^K \sum_{i=1}^{\tau} \left\| (H_{\pi_{(k-1)}}^\tau)^\top \nu_{(k-2)\tau} - \nu_{\pi_{k-1}} \right\|_1 + \gamma^i \left\| \nu_{\pi_{k-1}} - \nu_{\pi_k} \right\|_1 \\ &\leq 2T\gamma^\tau + \frac{1}{1 - \gamma} \sum_{k=1}^K \left\| \nu_{\pi_k} - \nu_{\pi_{k-1}} \right\|_1. \end{aligned}$$

For  $\tau \geq \frac{\log T}{2 \log(1/\gamma)}$ , the first term is upper-bounded by  $2\sqrt{T}$ .

Using results on perturbations of Markov chains (Seneta, 1988; Cho & Meyer, 2001), we have that

$$\left\| \nu_{\pi_k} - \nu_{\pi_{k-1}} \right\|_1 \leq \frac{1}{1 - \gamma} \|H_{\pi_k} - H_{\pi_{k-1}}\|_\infty \leq \frac{1}{1 - \gamma} \max_x \left\| \pi_k(\cdot|x) - \pi_{k-1}(\cdot|x) \right\|_1$$

Note that the policies  $\pi_k(\cdot|x)$  are generated by running mirror descent on reward functions  $\widehat{Q}_{\pi_k}(x, \cdot)$ . A well-known property of mirror descent updates with entropy regularization (or equivalently, the exponentially-weighted-average algorithm) is that the difference between consecutive policies is bounded as

$$\left\| \pi_{k+1}(\cdot|x) - \pi_k(\cdot|x) \right\|_1 \leq \eta \left\| \widehat{Q}_{\pi_k}(x, \cdot) \right\|_\infty.$$

See e.g. Neu et al. (2014) Section V.A for a proof, which involves applying Pinsker's inequality and Hoeffding's lemma (Cesa-Bianchi & Lugosi (2006) Section A.2 and Lemma A.6). Since we assume that  $\left\| \widehat{Q}_{\pi_k} \right\|_\infty \leq Q_{\max}$ , we can obtain

$$V_{T_2} \leq 2\sqrt{T} + (1 - \gamma)^{-2} K \eta Q_{\max}.$$

By choosing  $\eta = \frac{\sqrt{8 \log |\mathcal{A}|}}{Q_{\max} \sqrt{K}}$ , we can bound the second term as

$$V_{T_2} \leq 2\sqrt{T} + (1 - \gamma)^{-2} \sqrt{8K \log |\mathcal{A}|}. \quad (\text{B.2})$$

Putting Eq. (B.1) and (B.2) together, we obtain that with probability at least  $1 - \delta$ ,

$$V_T \leq 2(1 - \gamma)^{-1} \sqrt{2T \log(2/\delta)} + 2\sqrt{T} + (1 - \gamma)^{-2} \sqrt{8K \log |\mathcal{A}|}.$$

□

### C. Proof of Lemma 6.3

*Proof.* Recall that we split each phase into  $2m$  blocks of size  $b$  and let  $\mathcal{H}_i$  and  $\mathcal{T}_i$  denote the starting indices of odd and even blocks, respectively. We let  $R_t$  denote the empirical  $b$ -step returns from the state action pair  $(x_t, a_t)$  in phase  $i$ :

$$R_t = \sum_{i=t}^{t+b} (r_i - \hat{J}_{\pi_i}), \quad \hat{J}_{\pi_i} = \frac{1}{|\mathcal{T}_i|} \sum_{t \in \mathcal{T}_i} r_t.$$

We start by bounding the error in  $R_t$ . Let  $X$  be a binary indicator vector for a state-action pair  $(x, a)$ . Let  $H_\pi$  be the state-action transition kernel for policy  $\pi$ , and let  $\nu_\pi$  be the corresponding stationary state-action distribution. We can write the action-value function at  $(x, a)$  as

$$\begin{aligned} Q_\pi(x, a) &= r(x, a) - J_\pi + X^\top H_\pi Q_\pi \\ &= (X - \nu_\pi)^\top r + X^\top H_\pi (r - J_\pi \mathbf{1} + H_\pi Q_\pi) \\ &= \sum_{i=0}^{\infty} (X - \nu_\pi)^\top H_\pi^i r. \end{aligned}$$

Let  $Q_\pi^b(x, a) = \sum_{i=0}^b (X - \nu_\pi)^\top H_\pi^i r$  be a version of  $Q_\pi$  truncated to  $b$  steps. Under uniform mixing, the difference to the true  $Q_\pi$  is bounded as

$$|Q_\pi(x, a) - Q_\pi^b(x, a)| \leq \sum_{i=1}^{\infty} |(X - \nu_\pi)^\top H_\pi^{i+b} r| \leq \frac{2\gamma^{b+1}}{1-\gamma}. \quad (\text{C.1})$$

Let  $b_t = Q_{\pi_i}^b(x_t, a_t) - Q_{\pi_i}(x_t, a_t)$  denote the truncation bias at time  $t$ , and let  $z_t = \sum_{i=t}^{t+b} r_i - X_t^\top H_{\pi_i}^{(i-t)} r$  denote the reward noise. We will write

$$R_t = Q_{\pi_i}(x_t, a_t) + b(J_{\pi_i} - \hat{J}_{\pi_i}) + z_t + b_t.$$

Note that  $m = |\mathcal{H}_i|$  and let

$$\widehat{M}_i = \frac{1}{m} \sum_{t \in \mathcal{H}_i} \phi_t \phi_t^\top + \frac{\alpha}{m} I.$$

We estimate the value function of each policy  $\pi_i$  using data from phase  $i$  as

$$\begin{aligned} \widehat{w}_{\pi_i} &= \widehat{M}_i^{-1} m^{-1} \sum_{t \in \mathcal{H}_i} \phi_t R_t \\ &= \widehat{M}_i^{-1} m^{-1} \sum_{t \in \mathcal{H}_i} \phi_t (\phi_t^\top w_{\pi_i} + b_t + z_t + b(J_{\pi_i} - \hat{J}_{\pi_i})) + \widehat{M}_i^{-1} \frac{\alpha}{m} (w_{\pi_i} - w_{\pi_i}) \\ &= w_{\pi_i} + \widehat{M}_i^{-1} m^{-1} \sum_{t \in \mathcal{H}_i} \phi_t (z_t + b_t + b(J_{\pi_i} - \hat{J}_{\pi_i})) - \widehat{M}_i^{-1} m^{-1} \alpha w_{\pi_i} \end{aligned}$$

Our estimate  $\widehat{w}_k$  of  $w_k = \frac{1}{k} \sum_{i=1}^k w_{\pi_i}$  can thus be written as follows:

$$\widehat{w}_k - w_k = \frac{1}{km} \sum_{i=1}^k \sum_{t \in \mathcal{H}_i} \widehat{M}_i^{-1} \phi_t (z_t + b_t + b(J_{\pi_i} - \hat{J}_{\pi_i})) - \frac{\alpha}{km} \sum_{i=1}^k \widehat{M}_i^{-1} w_{\pi_i}.$$

We proceed to upper-bound the norm of the RHS.

Set  $\alpha = \sqrt{m/k}$ . Let  $C_w$  be an upper-bound on the norm of the true value-function weights  $\|w_{\pi_i}\|_2$  for  $i = 1, \dots, K$ . In Appendix C.3, we show that with probability at least  $1 - \delta$ , for  $m \geq 72C_w^4 \sigma^{-2} (1 - \gamma)^{-2} \log(d/\delta)$ ,  $\|\widehat{M}_i^{-1}\|_2 \leq 2\sigma^{-2}$ . Thus with probability at least  $1 - \delta$ , the last error term is upper-bounded as

$$\frac{\alpha}{km} \left\| \sum_{k=1}^k \widehat{M}_i^{-1} w_{\pi_i} \right\|_2 \leq 2\sigma^{-2} C_w (km)^{-1/2}. \quad (\text{C.2})$$

Similarly, for

$$b \geq \frac{\log((1-\gamma)^{-1}\sqrt{km})}{\log(1/\gamma)}, \quad (\text{C.3})$$

the norm of the truncation bias term is upper-bounded as

$$\frac{1}{km} \sum_{i=1}^k \sum_{t \in \mathcal{H}_i} \|\widehat{M}_i^{-1} \phi_t b_t\|_2 \leq \frac{2\gamma^b}{km(1-\gamma)} \sum_{i=1}^k \sum_{t \in \mathcal{H}_i} \|\widehat{M}_i^{-1} \phi_t\|_2 \leq 2\sigma^{-2} C_\Phi (km)^{-1/2}. \quad (\text{C.4})$$

To bound the error terms corresponding to reward noise  $z_t$  and average-error noise  $J_{\pi_i} - \widehat{J}_{\pi_i}$ , we rely on the independent blocks techniques of Yu (1994). We show in Sections C.1 and C.2 that with probability  $1 - 2\delta$ , for constants  $c_1$  and  $c_2$ , each of these terms can be bounded as:

$$\begin{aligned} \frac{1}{km} \left\| \sum_{i=1}^k \sum_{t \in \mathcal{H}_i} \widehat{M}_i^{-1} \phi_t z_t \right\|_2 &\leq 2c_1 C_\Phi \sigma^{-2} \sqrt{\frac{b \log(2d/\delta)}{km}} \\ \frac{b}{km} \left\| \sum_{i=1}^k (J_{\pi_i} - \widehat{J}_{\pi_i}) \sum_{t \in \mathcal{H}_i} \widehat{M}_i^{-1} \phi_t \right\|_2 &\leq 2c_2 C_\Phi \sigma^{-2} b \sqrt{\frac{\log(2d/\delta)}{km}}. \end{aligned}$$

Thus, putting terms together, we have for an absolute constant  $c$ , with probability at least  $1 - \delta$ ,

$$\|\widehat{w}_k - w_k\|_2 \leq c\sigma^{-2} (C_w + C_\Phi) b \sqrt{\frac{\log(2d/\delta)}{km}}.$$

Note that this result holds for every  $k \in [K]$  and thus also holds for  $k = K$ .  $\square$

### C.1. Bounding $\sum_{i=1}^k \widehat{M}_i^{-1} \sum_{t \in \mathcal{H}_i} \phi_t z_t$

Let  $\|\cdot\|_{\text{TV}}$  denote the total variation norm.

**Definition C.1** ( $\beta$ -mixing). Let  $\{Z_t\}_{t=1,2,\dots}$  be a stochastic process. Denote by  $Z_{1:t}$  the collection  $(Z_1, \dots, Z_t)$ , where we allow  $t = \infty$ . Let  $\sigma(Z_{i:j})$  denote the sigma-algebra generated by  $Z_{i:j}$  ( $i \leq j$ ). The  $k^{\text{th}}$   $\beta$ -mixing coefficient of  $\{Z_t\}$ ,  $\beta_k$ , is defined by

$$\begin{aligned} \beta_k &= \sup_{t \geq 1} \mathbb{E} \sup_{B \in \sigma(Z_{t+k:\infty})} |P(B|Z_{1:t}) - P(B)| \\ &= \sup_{t \geq 1} \mathbb{E} \|P_{Z_{t+k:\infty}|Z_{1:t}}(\cdot|Z_{1:t}) - P_{Z_{t+k:\infty}}(\cdot)\|_{\text{TV}}. \end{aligned}$$

$\{Z_t\}$  is said to be  $\beta$ -mixing if  $\beta_k \rightarrow 0$  as  $k \rightarrow \infty$ . In particular, we say that a  $\beta$ -mixing process mixes at an *exponential* rate with parameters  $\bar{\beta}, \alpha, \gamma > 0$  if  $\beta_k \leq \bar{\beta} \exp(-\alpha k^\gamma)$  holds for all  $k \geq 0$ .

Let  $X_t$  be the indicator vector for the state-action pair  $(x_t, a_t)$  as in Lemma A.2. Note that the distribution of  $(x_{t+1}, a_{t+1})$  given  $(x_t, a_t)$  can be written as  $\mathbb{E}[X_{t+1}|X_t]$ . Let  $H_t$  be the state-action transition matrix at time  $t$ , let  $H_{i:t} = \prod_{j=i}^{t-1} H_j$ , and define  $H_{i:i} = I$ . Then we have that  $\mathbb{E}[X_{t+k}|X_{1:t}] = H_{t:t+k}^\top X_t$  and  $\mathbb{E}[X_{t+k}] = H_{1:t+k}^\top \nu_0$ , where  $\nu_0$  is the initial state distribution. Thus, under the uniform mixing Assumption 2.1, the  $k^{\text{th}}$   $\beta$ -mixing coefficient is bounded as:

$$\beta_k \leq \sup_{t \geq 1} \mathbb{E} \sum_{j=k}^{\infty} \|H_{t:t+j}^\top X_t - H_{1:t+j}^\top \nu_0\|_1 \leq \sup_{t \geq 1} \mathbb{E} \sum_{j=k}^{\infty} \gamma^j \|X_t - H_{1:t}^\top \nu_0\|_1 \leq \frac{2\gamma^k}{1-\gamma}.$$

We bound the noise terms using the independent blocks technique of Yu (1994). Recall that we partition each phase into  $2m$  blocks of size  $b$ . Thus, after  $k$  phases we have a total of  $2km$  blocks. Let  $\mathbb{P}$  denote the joint distribution of state-action pairs in *odd* blocks. Let  $\mathcal{I}_i$  denote the set of indices in the  $i^{\text{th}}$  block, and let  $x_{\mathcal{I}_i}, a_{\mathcal{I}_i}$  denote the corresponding states and actions. We factorize the joint distribution according to blocks:

$$\begin{aligned} \mathbb{P}(x_{\mathcal{I}_1}, a_{\mathcal{I}_1}, x_{\mathcal{I}_3}, a_{\mathcal{I}_3}, \dots, x_{\mathcal{I}_{2km-1}}, a_{\mathcal{I}_{2km-1}}) &= \mathbb{P}_1(x_{\mathcal{I}_1}, a_{\mathcal{I}_1}) \times \mathbb{P}_3(x_{\mathcal{I}_3}, a_{\mathcal{I}_3} | x_{\mathcal{I}_1}, a_{\mathcal{I}_1}) \times \dots \\ &\quad \times \mathbb{P}_{2km-1}(x_{\mathcal{I}_{2km-1}}, a_{\mathcal{I}_{2km-1}} | x_{\mathcal{I}_{2km-3}}, a_{\mathcal{I}_{2km-3}}). \end{aligned}$$

Let  $\tilde{\mathbb{P}}_i$  be the marginal distribution over the variables in block  $i$ , and let  $\tilde{\mathbb{P}}$  be the product of marginals of odd blocks.

Corollary 2.7 of [Yu \(1994\)](#) implies that for any Borel-measurable set  $E$ ,

$$|\mathbb{P}(E) - \tilde{\mathbb{P}}(E)| \leq (km - 1)\beta_b \quad (\text{C.5})$$

where  $\beta_b$  is the  $b^{\text{th}}$   $\beta$ -mixing coefficient of the process. The result follows since the size of the ‘‘gap’’ between successive blocks is  $b$ ; see [Appendix E](#) for more details.

Recall that our estimates  $\hat{w}_{\pi_i}$  are based only on data in odd blocks in each phase. Let  $\tilde{\mathbb{E}}$  denote the expectation w.r.t. the product-of-marginals distribution  $\tilde{\mathbb{P}}$ . Then  $\tilde{\mathbb{E}}[\widehat{M}_i^{-1} \sum_{t \in \mathcal{H}_i} \phi_t z_t] = 0$  because for  $t \in \mathcal{H}_i$  and under  $\tilde{\mathbb{P}}$ ,  $z_t$  is zero-mean given  $\phi_t$  and is independent of other feature vectors outside of the block. Furthermore, by Hoeffding’s inequality  $\tilde{\mathbb{P}}(|z_t|/b \geq a) \leq 2 \exp(-2ba^2)$ . Since  $\|\phi_t\|_2 \leq C_{\Phi}$  and  $\|\widehat{M}_i^{-1}\|_2 \leq 2\sigma^{-2}$  for large enough  $m$ , we have that

$$\tilde{\mathbb{P}}(\|\widehat{M}_i^{-1} \phi_t z_t\|_2 \geq 2b\sigma^{-2}C_{\Phi}a) \leq 2 \exp(-2ba^2).$$

Since  $\widehat{M}_i^{-1} \phi_t z_t$  are norm-subGaussian vectors, using [Lemma A.4](#), there exists a constant  $c_1$  such that for any  $\delta \geq 0$

$$\tilde{\mathbb{P}} \left( \left\| \sum_{i=1}^k \widehat{M}_i^{-1} \sum_{t \in \mathcal{H}_i} \phi_t z_t \right\|_2 \geq 2c_1 C_{\Phi} \sigma^{-2} \sqrt{bkm \log(2d/\delta)} \right) \leq \delta.$$

Thus, using [\(C.5\)](#),

$$\mathbb{P} \left( \left\| \sum_{i=1}^k \widehat{M}_i^{-1} \sum_{t \in \mathcal{H}_i} \phi_t z_t \right\|_2 \geq 2c_1 C_{\Phi} \sigma^{-2} \sqrt{bkm \log(2d/\delta)} \right) \leq \delta + (km - 1)\beta_b.$$

Under [Assumption 2.1](#), we have that  $\beta_b \leq 2\gamma^b(1 - \gamma)^{-1}$ . Setting  $\delta = 2km\gamma^b(1 - \gamma)^{-1}$  and solving for  $b$  we get

$$b = \frac{\log(2km\delta^{-1}(1 - \gamma)^{-1})}{\log(1/\gamma)}. \quad (\text{C.6})$$

Notice that when  $b$  is chosen as in [Eq. \(C.6\)](#), the condition [\(C.3\)](#) is also satisfied. Plugging this into the previous display gives that with probability at least  $1 - 2\delta$ ,

$$\left\| \sum_{i=1}^k \widehat{M}_i^{-1} \sum_{t \in \mathcal{H}_i} \phi_t z_t \right\|_2 \leq 2c_1 C_{\Phi} \sigma^{-2} \sqrt{bkm \log(2d/\delta)}.$$

## C.2. Bounding $\left\| \sum_{i=1}^k \widehat{M}_i^{-1} \sum_{t \in \mathcal{H}_i} \phi_t (J_{\pi_i} - \widehat{J}_{\pi_i}) \right\|_2$

Recall that the average-reward estimates  $\widehat{J}_{\pi_i}$  are computed using time indices corresponding to the starts of even blocks,  $\mathcal{T}_i$ . Thus this error term is only a function of the indices corresponding to block starts. Now let  $\mathbb{P}$  denote the distribution over state-action pairs  $(x_t, a_t)$  for indices  $t$  corresponding to block starts, i.e.  $t \in \{1, b + 1, 2b + 1, \dots, (2km - 1)b + 1\}$ . We again factorize the distribution over blocks as  $\mathbb{P} = \mathbb{P}_1 \otimes \mathbb{P}_2 \otimes \dots \otimes \mathbb{P}_{2km}$ . Let  $\tilde{\mathbb{P}} = \tilde{\mathbb{P}}_1 \otimes \tilde{\mathbb{P}}_2 \otimes \dots \otimes \tilde{\mathbb{P}}_{2km}$  be a product-of-marginals distribution defined as follows. For odd  $j$ , let  $\tilde{\mathbb{P}}_j$  be the marginal of  $\mathbb{P}$  over  $(x_{jb+1}, a_{jb+1})$ . For even  $j$  in phase  $i$ , let  $\tilde{\mathbb{P}}_j = \nu_{\pi_i}$  correspond to the stationary distribution of the corresponding policy  $\pi_i$ . Using arguments similar to independent blocks, we show in [Appendix E](#) that

$$\|\mathbb{P} - \tilde{\mathbb{P}}\|_1 \leq 2(2km - 1)\gamma^{b-1}.$$

Let  $\tilde{\mathbb{E}}$  denote expectation w.r.t. the product-of-marginals distribution  $\tilde{\mathbb{P}}$ . Then  $\tilde{\mathbb{E}}[\widehat{M}_i^{-1} \sum_{t \in \mathcal{H}_i} \phi_t (J_{\pi_i} - \widehat{J}_{\pi_i})] = 0$ , since under  $\tilde{\mathbb{P}}$ ,  $\widehat{J}_{\pi_i}$  is the sum of rewards for state-action pairs distributed according to  $\nu_{\pi_i}$ , and these state-action pairs are independent of other data. Using a similar argument as in the previous section, for  $b = 1 + \frac{\log(4km/\delta)}{\log(1/\gamma)}$ , there exists a constant  $c_2$  such that with probability at least  $1 - 2\delta$ ,

$$\left\| \sum_{i=1}^k \widehat{M}_i^{-1} \sum_{t \in \mathcal{H}_i} \phi_t (J_{\pi_i} - \widehat{J}_{\pi_i}) \right\|_2 \leq 2c_2 C_{\Phi} \sigma^{-2} \sqrt{km \log(2d/\delta)}.$$

**C.3. Bounding  $\|\widehat{M}_i^{-1}\|_2$** 

In this subsection, we show that with probability at least  $1 - \delta$ , for  $m \geq 72C_{\Phi}^4\sigma^{-2}(1 - \gamma)^{-2} \log(d/\delta)$ ,  $\|M_i^{-1}\|_2 \leq 2\sigma^{-2}$ .

Let  $\Phi$  be a  $|\mathcal{X}||\mathcal{A}| \times d$  matrix of all features. Let  $D_i = \text{diag}(\nu_{\pi_i})$ , and let  $\widehat{D}_i = \text{diag}(\sum_{t \in \mathcal{H}_i} X_t)$ , where  $X_t$  is a state-action indicator as in Lemma A.2. Let  $M_i = \Phi^\top D_i \Phi + \alpha m^{-1} I$ . We can write  $\widehat{M}_i^{-1}$  as

$$\begin{aligned} \widehat{M}_i^{-1} &= (\Phi^\top \widehat{D}_i \Phi + \alpha \tau^{-1} I + \Phi^\top (D_i - \widehat{D}_i) \Phi)^{-1} \\ &= (M_i + \Phi^\top (D_i - \widehat{D}_i) \Phi)^{-1} \\ &= (I + M_i^{-1} \Phi^\top (D_i - \widehat{D}_i) \Phi)^{-1} M_i^{-1} \end{aligned}$$

By Assumption 6.2 and 6.1,  $\|M_i^{-1}\|_2 \leq \sigma^{-2}$ . In Appendix C.4, we show that w.p. at least  $1 - \delta$ ,

$$\|\Phi^\top (\widehat{D}_i - D_i) \Phi\|_2 \leq 6m^{-1/2} C_{\Phi}^2 (1 - \gamma)^{-1} \sqrt{2 \log(d/\delta)}$$

Thus

$$\|\widehat{M}_i^{-1}\|_2 \leq \sigma^{-2} (1 - \sigma^{-2} 6m^{-1/2} C_{\Phi}^2 (1 - \gamma)^{-1} \sqrt{2 \log(d/\delta)})^{-1}$$

For  $m \geq 72C_{\Phi}^4\sigma^{-2}(1 - \gamma)^{-2} \log(d/\delta)$ , the above norm is upper-bounded by  $\|\widehat{M}_i^{-1}\|_2 \leq 2\sigma^{-2}$ .

**C.4. Bounding  $\|\Phi^\top (\widehat{D}_i - D_i) \Phi^\top\|_2$** 

For any matrix  $A$ ,

$$\|\Phi^\top A \Phi\|_2 = \left\| \sum_{i,j} A_{ij} \phi_i \phi_j^\top \right\|_2 \leq \sum_{i,j} |A_{ij}| \|\phi_i \phi_j^\top\|_2 \leq C_{\Phi}^2 \sum_{i,j} |A_{ij}| = C_{\Phi}^2 \|A\|_{1,1}. \quad (\text{C.7})$$

where  $\|A\|_{1,1}$  denotes the sum of absolute entries of  $A$ . Using the same notation for  $X_t$  as in Lemma A.2,

$$\begin{aligned} \|\Phi^\top (\widehat{D}_i - D_i) \Phi\|_2 &= \frac{1}{m} \sum_{t \in \mathcal{H}_i} \Phi^\top \text{diag}(X_t - \nu_t + \nu_t - \nu_{\pi_i}) \Phi \\ &\leq \frac{1}{m} \left\| \sum_{t \in \mathcal{H}_i} \Phi^\top \text{diag}(X_t - \nu_t) \Phi \right\|_2 + \frac{C_{\Psi}^2}{m} \sum_{t \in \mathcal{H}_i} \|\nu_t - \nu_{\pi_i}\|_1. \end{aligned}$$

Under the fast-mixing assumption 2.1, the second term is bounded by  $2C_{\Psi}^2 m^{-1} (1 - \gamma)^{-1}$ .

For the first term, we can define a martingale  $(B_i)_{i=0}^m$  similar to the Doob martingale in Lemma A.2, but defined only on the  $m$  indices  $\mathcal{H}_i$ . Note that  $\sum_{t \in \mathcal{H}_i} \Phi^\top \text{diag}(X_t - \nu_t) \Phi = \Phi^\top \text{diag}(B_m - B_0) \Phi$ . Thus we can use matrix-Azuma to bound the difference sequence. Given that

$$\|(\Phi^\top (B_i - B_{i-1}) \Phi)^2\|_2 \leq 4C_{\Phi}^4 (1 - \gamma)^{-2},$$

combining the two terms, we have that with probability at least  $1 - \delta$ ,

$$\begin{aligned} \|\Phi^\top (\widehat{D}_i - D_i) \Phi\|_2 &\leq 4m^{-1/2} C_{\Phi}^2 (1 - \gamma)^{-1} \sqrt{2 \log(d/\delta)} + 2m^{-1} C_{\Phi}^2 (1 - \gamma)^{-1} \\ &\leq 6m^{-1/2} C_{\Phi}^2 (1 - \gamma)^{-1} \sqrt{2 \log(d/\delta)}. \end{aligned}$$

**D. Bounding  $\|V_K - \widehat{V}_K\|_{\mu_*}$** 

We write the value function error as follows:

$$\begin{aligned} \mathbb{E}_{x \sim \mu_*} [\widehat{V}_K(x) - V_K(x)] &= \sum_x \mu_*(x) \sum_a \phi(x, a)^\top \frac{1}{K} \sum_{i=1}^K \pi_i(a|x) (\widehat{w}_{\pi_i} - w_{\pi_i}) \\ &\leq \frac{1}{K} \sum_x \mu_*(x) \sum_a \|\phi(x, a)\|_2 \left\| \sum_{i=1}^K \pi_i(a|x) (\widehat{w}_{\pi_i} - w_{\pi_i}) \right\|_2 \end{aligned}$$

Note that for any set of scalars  $\{p_i\}_{i=1}^K$  with  $p_i \in [0, 1]$ , the term  $\left\| \sum_{i=1}^K p_i (\hat{w}_{\pi_i} - w_{\pi_i}) \right\|_2$  has the same upper bound as  $\left\| \sum_{i=1}^K (\hat{w}_{\pi_i} - w_{\pi_i}) \right\|_2$ . The reason is as follows. One part of the error includes bias terms (C.2) and (C.4), whose upper bounds are only smaller when reweighted by scalars in  $[0, 1]$ . Thus we can simply upper-bound the bias by setting all  $\{p_i\}_{i=1}^K$  to 1. Another part of the error, analyzed in Appendices C.1 and C.2 involves sums of norm-subGaussian vectors. In this case, applying the weights only results in these vectors potentially having smaller norm bounds. We keep the same bounds for simplicity, again corresponding to all  $\{p_i\}_{i=1}^K$  equal to 1. Thus, reusing the results of the previous section, we have

$$\mathbb{E}_{x \sim \mu^*} [\widehat{V}_K(x) - V_K(x)] \leq C_\Phi |\mathcal{A}| c\sigma^{-2} (C_w + C_\Phi) b \sqrt{\frac{\log(2d/\delta)}{Km}}.$$

## E. Independent Blocks

**Blocks.** Recall that we partition each phase into  $2m$  blocks of size  $b$ . Thus, after  $k$  phases we have a total of  $2km$  blocks. Let  $\mathbb{P}$  denote the joint distribution of state-action pairs in odd blocks. Let  $\mathcal{I}_i$  denote the set of indices in the  $i^{\text{th}}$  block, and let  $x_{\mathcal{I}_i}, a_{\mathcal{I}_i}$  denote the corresponding states and actions. We factorize the joint distribution according to blocks:

$$\begin{aligned} \mathbb{P}(x_{\mathcal{I}_1}, a_{\mathcal{I}_1}, x_{\mathcal{I}_3}, a_{\mathcal{I}_3}, \dots, x_{\mathcal{I}_{2km-1}}, a_{\mathcal{I}_{2km-1}}) &= \mathbb{P}_1(x_{\mathcal{I}_1}, a_{\mathcal{I}_1}) \times \mathbb{P}_3(x_{\mathcal{I}_3}, a_{\mathcal{I}_3} | x_{\mathcal{I}_1}, a_{\mathcal{I}_1}) \times \dots \\ &\quad \times \mathbb{P}_{2km-1}(x_{\mathcal{I}_{2km-1}}, a_{\mathcal{I}_{2km-1}} | x_{\mathcal{I}_{2km-3}}, a_{\mathcal{I}_{2km-3}}). \end{aligned}$$

Let  $\tilde{\mathbb{P}}_i$  be the marginal distribution over the variables in block  $i$ , and let  $\tilde{\mathbb{P}}$  be the product of marginals. Then the difference between the distributions  $\tilde{\mathbb{P}}$  and  $\mathbb{P}$  can be written as

$$\begin{aligned} \mathbb{P} - \tilde{\mathbb{P}} &= \mathbb{P}_1 \otimes \mathbb{P}_3 \otimes \dots \otimes \mathbb{P}_{2km-1} - \mathbb{P}_1 \otimes \tilde{\mathbb{P}}_3 \otimes \dots \otimes \tilde{\mathbb{P}}_{2km-1} \\ &= \mathbb{P}_1 \otimes (\mathbb{P}_3 - \tilde{\mathbb{P}}_3) \otimes \mathbb{P}_5 \otimes \dots \otimes \mathbb{P}_{2km-1} \\ &\quad + \mathbb{P}_1 \otimes \tilde{\mathbb{P}}_3 \otimes (\mathbb{P}_5 - \tilde{\mathbb{P}}_5) \otimes \mathbb{P}_7 \otimes \dots \otimes \mathbb{P}_{2km-1} \\ &\quad + \dots \\ &\quad + \mathbb{P}_1 \otimes \tilde{\mathbb{P}}_3 \otimes \tilde{\mathbb{P}}_5 \otimes \dots \otimes \tilde{\mathbb{P}}_{2km-3} \otimes (\mathbb{P}_{2km-1} - \tilde{\mathbb{P}}_{2km-1}). \end{aligned}$$

Under  $\beta$ -mixing, since the gap between the blocks is of size  $b$ , we have that

$$\|\mathbb{P}_i(x_{\mathcal{I}_i}, a_{\mathcal{I}_i} | x_{\mathcal{I}_{i-2}}, a_{\mathcal{I}_{i-2}}) - \tilde{\mathbb{P}}_i(x_{\mathcal{I}_i}, a_{\mathcal{I}_i})\|_1 \leq \beta_b = \frac{2\gamma^b}{1-\gamma}.$$

Thus the difference between the joint distribution and the product of marginals is bounded as

$$\|\mathbb{P} - \tilde{\mathbb{P}}\|_1 \leq (km - 1)\beta_b.$$

**Block starts.** Now let  $\mathbb{P}$  denote the distribution over state-action pairs  $(x_t, a_t)$  for indices  $t$  corresponding to block starts, i.e.  $t \in \{1, b+1, 2b+1, \dots, (2km-1)b+1\}$ . We again factorize the distribution over blocks:

$$\mathbb{P}(x_1, a_1, x_{b+1}, a_{b+1}, \dots, x_{(2km-1)b+1}, a_{(2km-1)b+1}) = \mathbb{P}_1(x_1, a_1) \prod_{j=2}^{2km} \mathbb{P}_i(x_{jb+1}, a_{jb+1} | x_{(j-1)b+1}, a_{(j-1)b+1}).$$

Define a product-of-marginals distribution  $\tilde{\mathbb{P}} = \tilde{\mathbb{P}}_1 \otimes \tilde{\mathbb{P}}_2 \otimes \dots \otimes \tilde{\mathbb{P}}_{2km}$  over the block-start variables as follows. For odd  $j$ , let  $\tilde{\mathbb{P}}_j$  be the marginal of  $\mathbb{P}$  over  $(x_{jb+1}, a_{jb+1})$ . For even  $j$  in phase  $i$ , let  $\tilde{\mathbb{P}}_j = \nu_{\pi_i}$  correspond to the stationary distribution of the policy  $\pi_i$ . Using the same notation as in Appendix A, let  $X_t$  be the indicator vector for  $(x_t, a_t)$  and let  $H_{i:j}$  be the product of state-action transition matrices at times  $i+1, \dots, j$ . For odd blocks  $j$ , we have

$$\|\mathbb{P}_j(\cdot | x_{(j-1)b+1}, a_{(j-1)b+1}) - \tilde{\mathbb{P}}_j(\cdot)\|_1 = \|H_{(j-1)b+1:j}^\top (X_{(j-1)b+1} - \tilde{\mathbb{P}}_{j-1})\|_1 \leq 2\gamma^{b-1}.$$

Slightly abusing notation, let  $H_{\pi_i}$  be the state-action transition matrix under policy  $\pi_i$ . For even blocks  $j$  in phase  $i$ , since they always follow an odd block in the same phase,

$$\|\mathbb{P}_j(\cdot | x_{(j-1)b+1}, a_{(j-1)b+1}) - \tilde{\mathbb{P}}_j(\cdot)\|_1 = \|(H_{\pi_i}^{b-1})^\top (X_{(j-b)+1} - \nu_{\pi_i})\|_1 \leq 2\gamma^{b-1}.$$

Thus, using a similar distribution decomposition as before, we have that  $\|\mathbb{P} - \tilde{\mathbb{P}}\|_1 \leq 2(2km - 1)\gamma^{b-1}$ .
